# Supplementary material for: Genetic and Biochemical Characterization of Human AP Endonuclease 1 Mutants Deficient in Nucleotide Incision Repair Activity
Source: PubMed Central journal article supplement (PMC2923195; doi:10.1371/journal.pone.0012241), 2010-08-17
Supplement: pone.0012241.s002.pdf [file pone.0012241.s002.pdf]

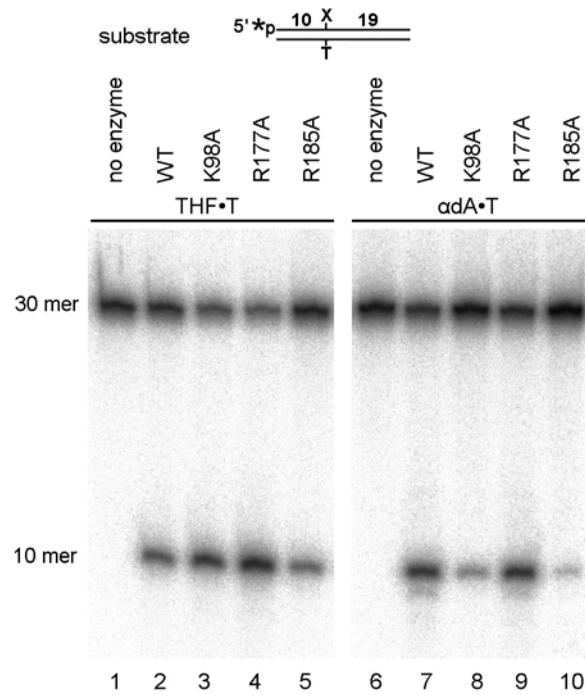

**Figure S2. Comparison of AP endonuclease and NIR activities of WT and mutant APE1 proteins.** 5 nM of [<sup>32</sup>P]-labelled THF•T and αdA•T were incubated with WT and mutant APE1 proteins, enzyme concentration was 20 pM for test of AP endonuclease activity on THF•T or 1 nM in case of NIR activity on αdA•T substrate. Products of reaction were analyzed by denaturing PAGE. For details see Methods.
