# Supplementary material for: Genetic and Biochemical Characterization of Human AP Endonuclease 1 Mutants Deficient in Nucleotide Incision Repair Activity
Source: PubMed Central journal article supplement (PMC2923195; doi:10.1371/journal.pone.0012241), 2010-08-17
Supplement: pone.0012241.s004.pdf [file pone.0012241.s004.pdf]

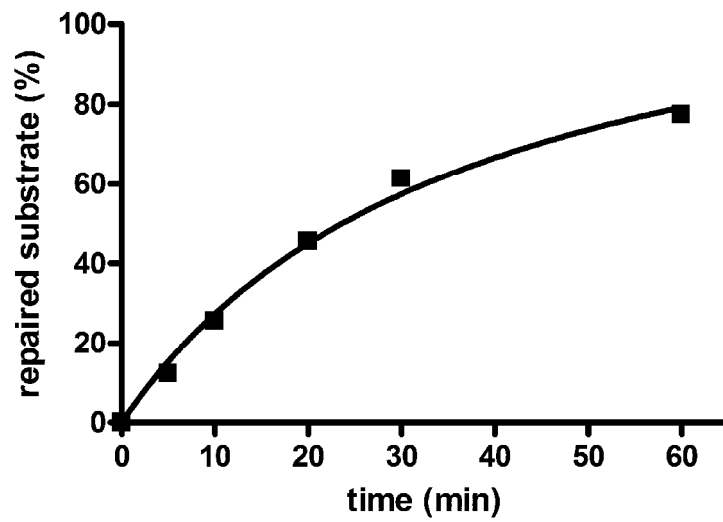

**Figure S4. Kinetics of  $\alpha$ DA removal in the reconstitution assay.** The amount of  $\alpha$ DA•T<sup>34</sup> cleavage product made by APE1 alone was taken as 100%. For details, see *Methods*.
